# Supplementary material
Source: PubMed Central journal article supplement (PMC4288460)
Supplement: NIHMS652453-supplement-01.pdf [file NIHMS652453-supplement-01.pdf]

Supplemental Table 1

*SNAP Parcel Content, Internal Consistency, and Item-Total Correlations*

| Parcel<br>Abbrev. | Parcel Name                                  | Example of Item Content                                            | No. of<br>Items | $\alpha$ | Mean<br>item-total<br>corr |
|-------------------|----------------------------------------------|--------------------------------------------------------------------|-----------------|----------|----------------------------|
| PPD Mst           | Paranoid PD: Mistrust                        | Often use me instead of treating like a person                     | 11              | .83      | .60                        |
| PPD Agg           | Paranoid PD: Aggression                      | Try to get even when someone hurts me                              | 5               | .68      | .66                        |
| PPD Soc           | Paranoid PD: Social Isolation                | Best not to let others know you well                               | 5               | .63      | .63                        |
| SZ Alf            | Schizoid PD: Aloof                           | Don't like spending time with people                               | 9               | .90      | .61                        |
| SZ LPA            | Schizoid PD: Low Positive Affect             | Rarely feel happiness                                              | 7               | .61      | .55                        |
| ST Odd            | Schizotypal PD: Odd                          | Feel the presence of someone not really there                      | 7               | .72      | .62                        |
| ST Mst            | Schizotypal PD: Mistrust                     | Wonder if people can be trusted                                    | 9               | .72      | .56                        |
| AS SD             | Antisocial PD: Social Deviance               | Lying comes easily                                                 | 8               | .70      | .58                        |
| AS Agg            | Antisocial PD: Aggression                    | Would not start a physical fight (F)                               | 3               | .65      | .77                        |
| AS Imp            | Antisocial PD: Impulsivity                   | Often act without thinking                                         | 7               | .58      | .55                        |
| AS CD             | Antisocial PD: Conduct Disorder              | Always in trouble as a kid for breaking rules at<br>home or school | 12              | .82      | .57                        |
| BPD AR            | Borderline PD: Antagonistic<br>Relationships | Have a lot of 'love-hate' relationships                            | 3               | .57      | .73                        |
| BPD IA            | Borderline PD: Insecure Attachments          | Would do almost anything to keep someone<br>from leaving           | 2               | .50      | .82                        |

|          |                                           |                                                 |    |     |     |
|----------|-------------------------------------------|-------------------------------------------------|----|-----|-----|
| BPD Imp  | Borderline PD: Impulsivity                | Rarely do anything reckless (F)                 | 8  | .55 | .49 |
| BPD Emo  | Borderline PD: Emotional Reactivity       | Become angry easily                             | 6  | .79 | .70 |
| BPD Diss | Borderline PD: Dissociation               | Feel unreal, as if looking at self from outside | 6  | .65 | .60 |
| BPD SH   | Borderline PD: Self Harm                  | Hurt self on purpose                            | 3  | .73 | .81 |
| HPD Atn  | Histrionic PD: Attention Seeking/Dramatic | Enjoy turning heads when walk into a room       | 8  | .74 | .60 |
| HPD Sugg | Histrionic PD: Suggestibility             | Easily swayed by people's arguments             | 3  | .52 | .72 |
| HPD Sex  | Histrionic PD: Sexual Provocativeness     | Love flirting                                   | 3  | .63 | .75 |
| HPD Emo  | Histrionic PD: Emotional Lability         | Mood goes up and down                           | 4  | .71 | .73 |
| NPD Grnd | Narcissistic PD: Grandiosity              | Am an extraordinary person                      | 9  | .75 | .58 |
| NPD Envy | Narcissistic PD: Envy                     | Feel envious of people who have more            | 4  | .67 | .71 |
| NPD Adm  | Narcissistic PD: Requires Admiration      | Don't like the spotlight (F)                    | 4  | .61 | .68 |
| NPD Man  | Narcissistic PD: Manipulativeness         | Good at convincing others to do my work         | 2  | .60 | .85 |
| AVD FR   | Avoidant PD: Fear of Rejection            | Worry about social criticism or rejection       | 8  | .84 | .68 |
| AVD Inad | Avoidant PD: Inadequate                   | Feel inadequate when meeting people             | 6  | .67 | .61 |
| DPN Nurt | Dependent PD: Nurturance                  | Have trouble disagreeing because want approval  | 3  | .78 | .83 |
| DPN Dep  | Dependent PD: Dependency                  | Make decisions based on what others think       | 11 | .78 | .57 |
| DPN Help | Dependent PD: Helplessness                | Feel helpless when alone                        | 4  | .59 | .67 |
| OC Per   | OCPD: Perfectionism                       | Task isn't finished until it's perfect          | 5  | .52 | .59 |
| OC WE    | OCPD: Work Ethic                          | Put my work ahead of many other things          | 5  | .72 | .68 |
| OC Scrp  | OCPD: Scrupulosity                        | Important to play strictly by the rules         | 3  | .53 | .71 |

|        |                         |                                                    |   |     |     |
|--------|-------------------------|----------------------------------------------------|---|-----|-----|
| OC Rig | OCPD: Rigidity          | Pretty stubborn                                    | 8 | .57 | .50 |
| OC Hrd | OCPD: Hoarding Behavior | Difficulty throwing things out even if of no value | 2 | .71 | .88 |

*Note.* Items marked with an F are characteristic of the parcel when endorsed as false (i.e., these are reverse scored items). SNAP = Schedule for Nonadaptive and Adaptive Personality; Abbrev = abbreviation; no = number, corr = correlation; PD = personality disorder; OCPD = obsessive-compulsive personality disorder; F = false.
